# Supplementary material
Source: ML conference proceedings conference paper supplement (https://openreview.net/forum?id=hlPk6Hi43e)

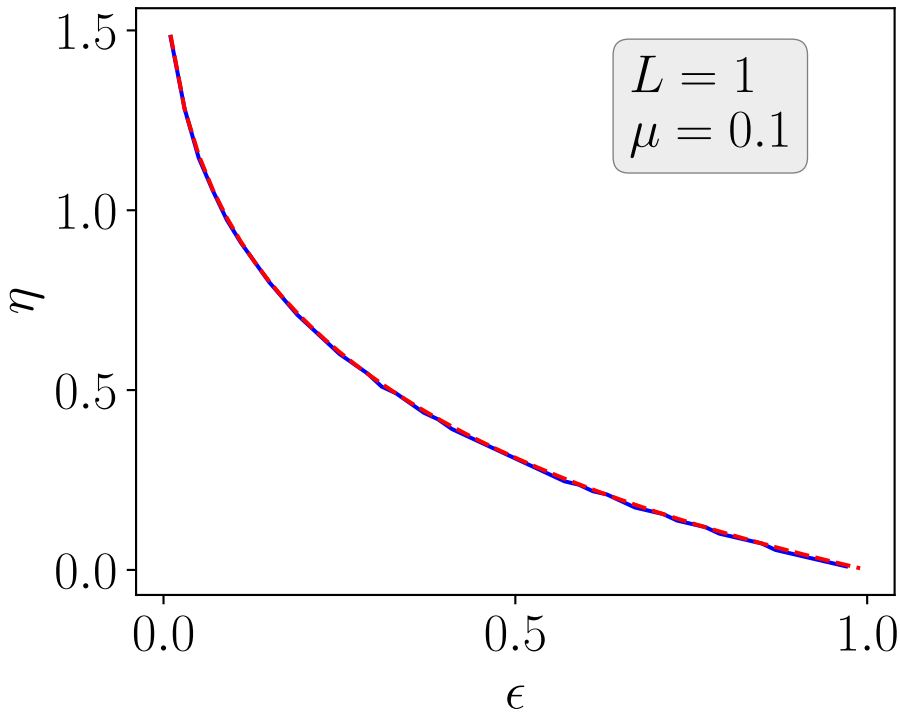

Supplement: supplementary_material [file best_etas_0.1_1.pdf › neurips2025/figures/best_etas_0.1_1.pdf]

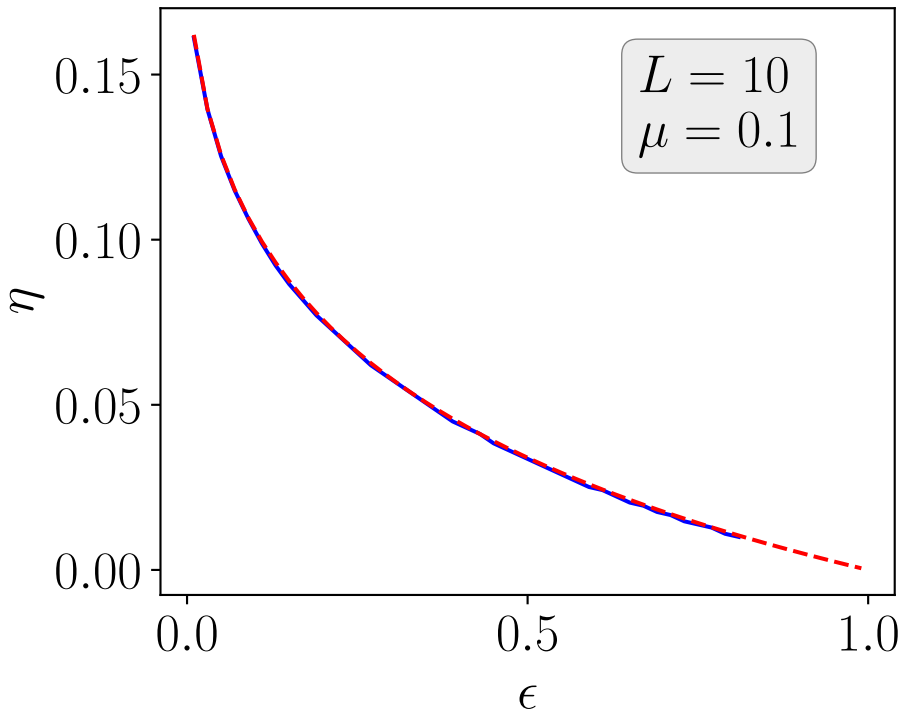

Supplement: supplementary_material [file best_etas_0.1_10.pdf › neurips2025/figures/best_etas_0.1_10.pdf]

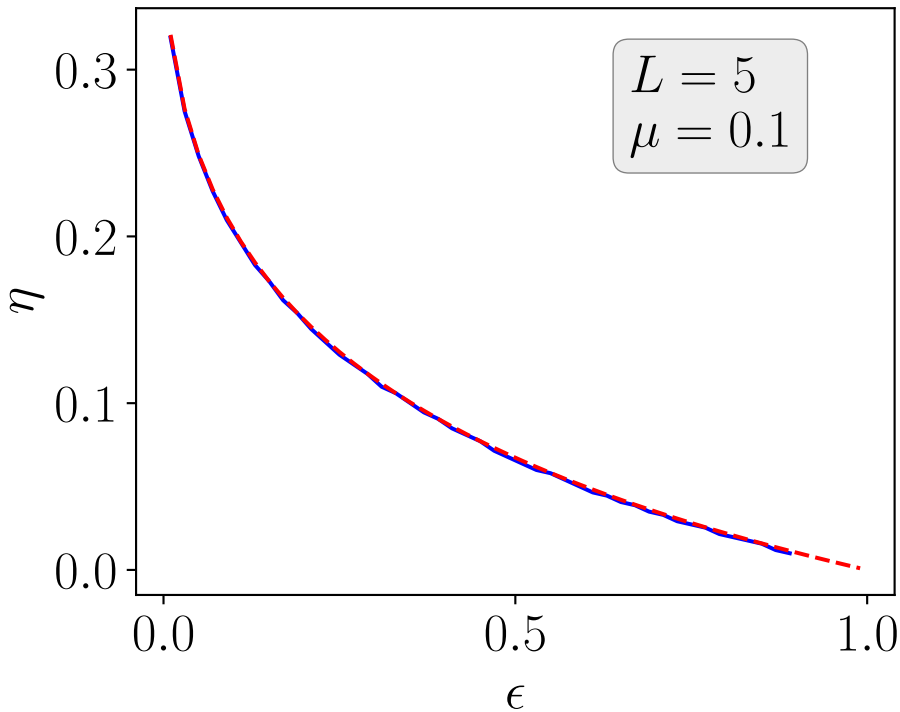

Supplement: supplementary_material [file best_etas_0.1_5.pdf › neurips2025/figures/best_etas_0.1_5.pdf]

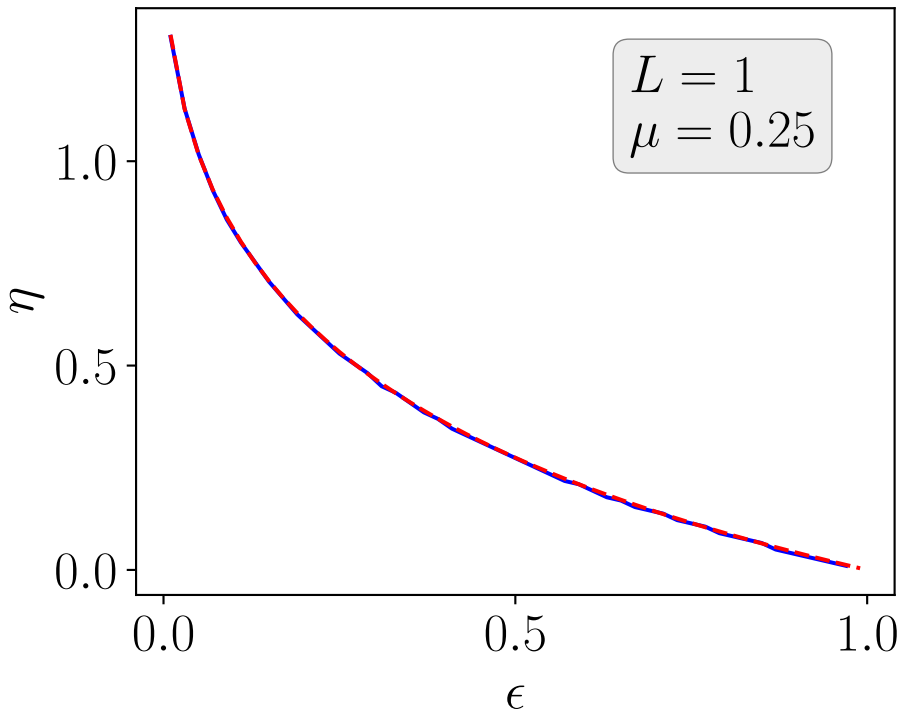

Supplement: supplementary_material [file best_etas_0.25_1.pdf › neurips2025/figures/best_etas_0.25_1.pdf]

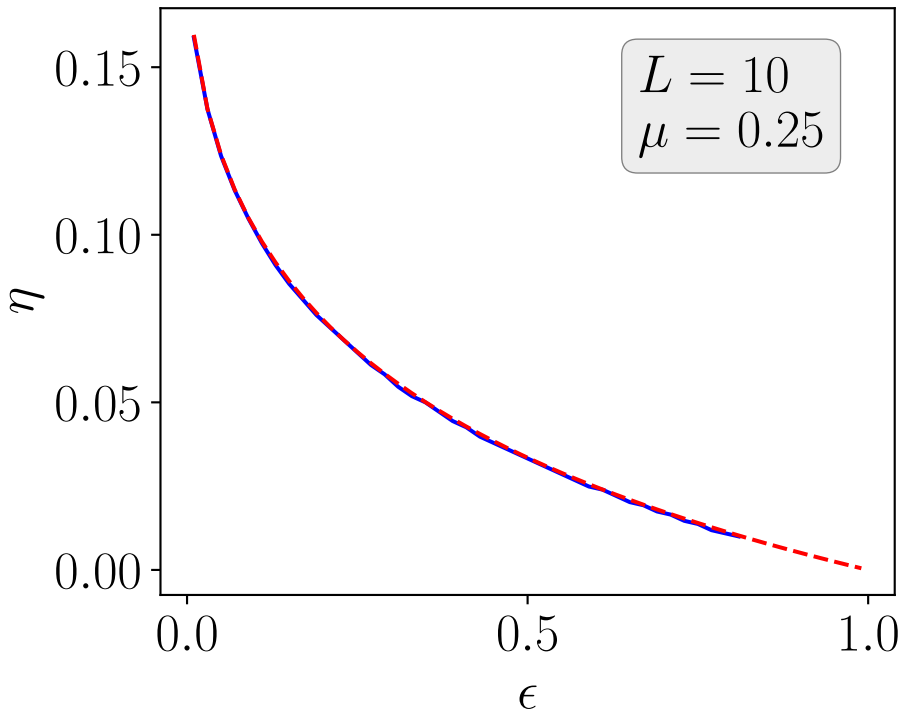

Supplement: supplementary_material [file best_etas_0.25_10.pdf › neurips2025/figures/best_etas_0.25_10.pdf]

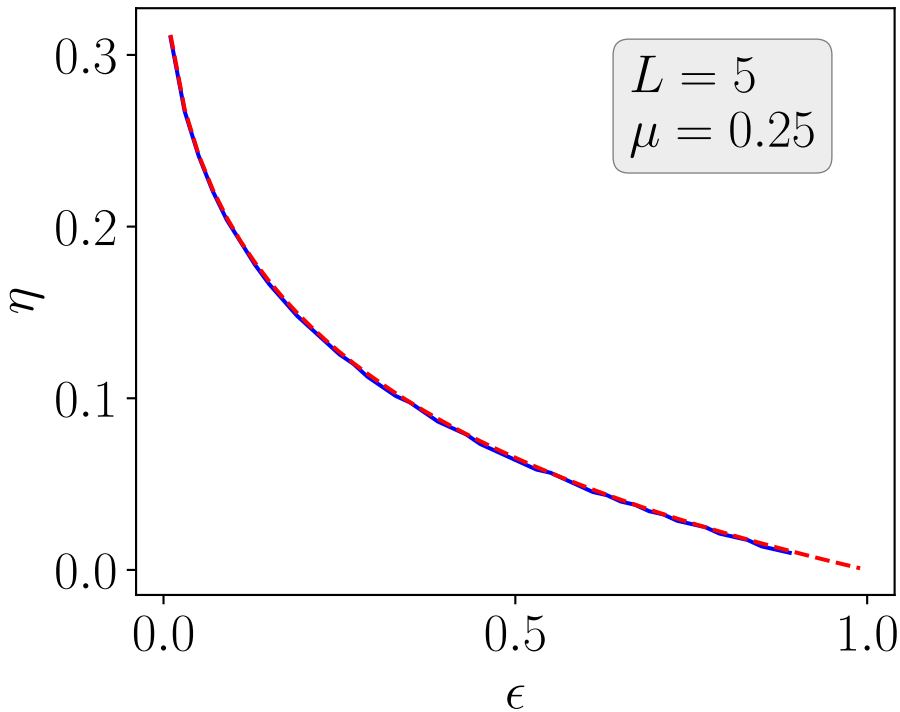

Supplement: supplementary_material [file best_etas_0.25_5.pdf › neurips2025/figures/best_etas_0.25_5.pdf]

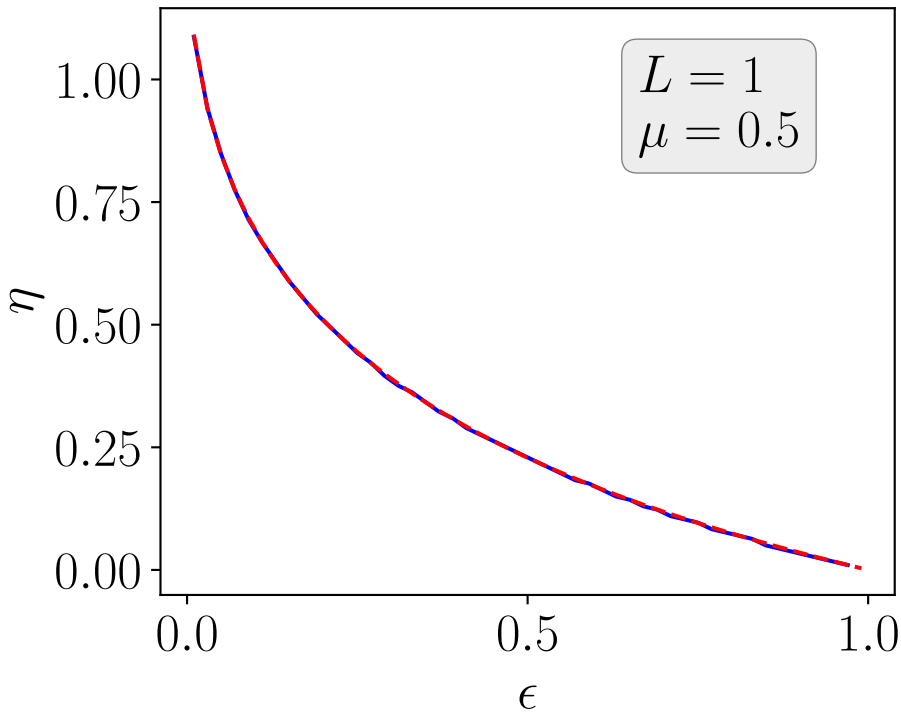

Supplement: supplementary_material [file best_etas_0.5_1.pdf › neurips2025/figures/best_etas_0.5_1.pdf]

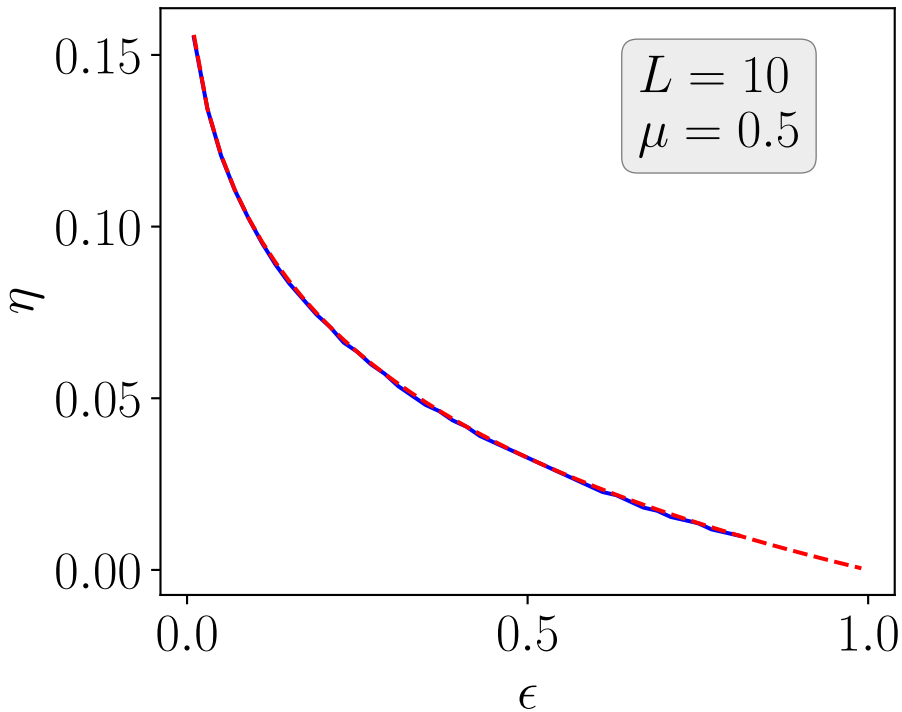

Supplement: supplementary_material [file best_etas_0.5_10.pdf › neurips2025/figures/best_etas_0.5_10.pdf]

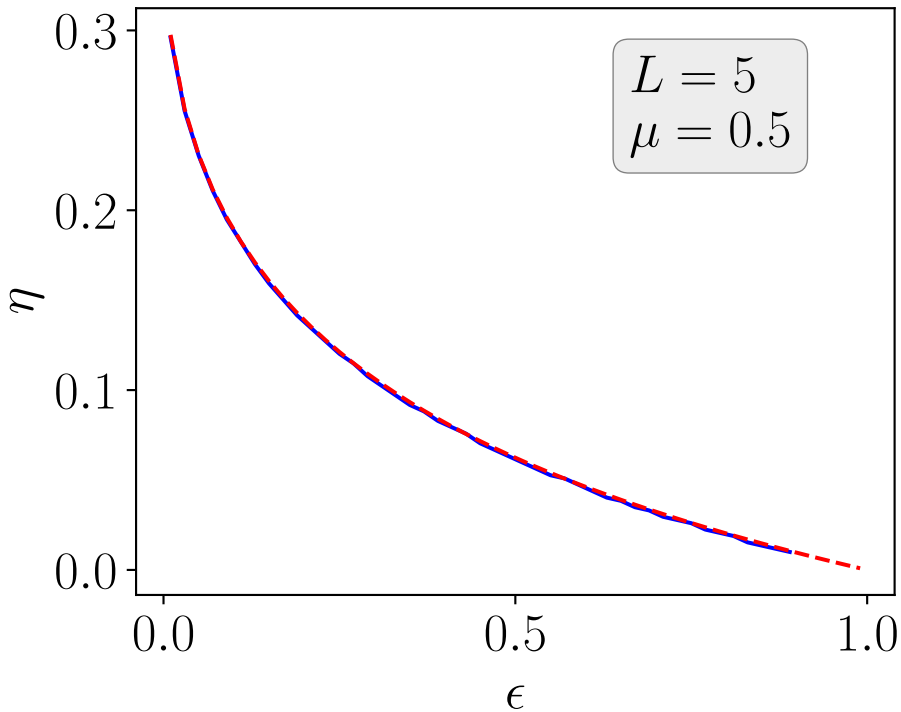

Supplement: supplementary_material [file best_etas_0.5_5.pdf › neurips2025/figures/best_etas_0.5_5.pdf]

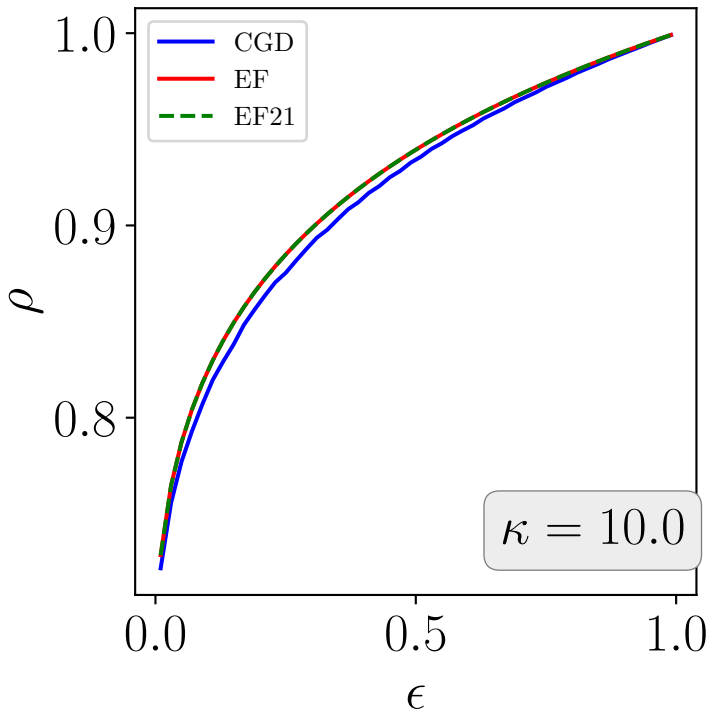

Supplement: supplementary_material [file cgd_superiority_mu_0.1.pdf › neurips2025/figures/cgd_superiority_mu_0.1.pdf]

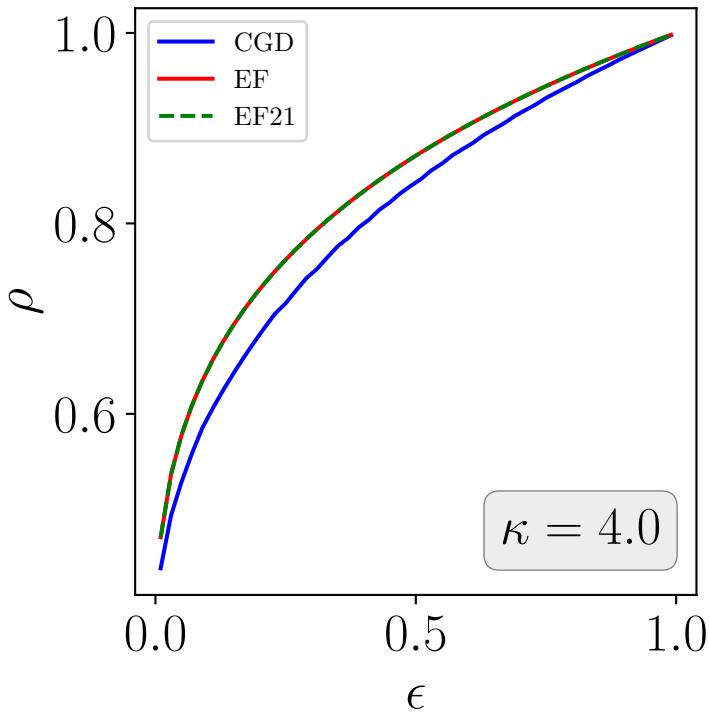

Supplement: supplementary_material [file cgd_superiority_mu_0.25.pdf › neurips2025/figures/cgd_superiority_mu_0.25.pdf]

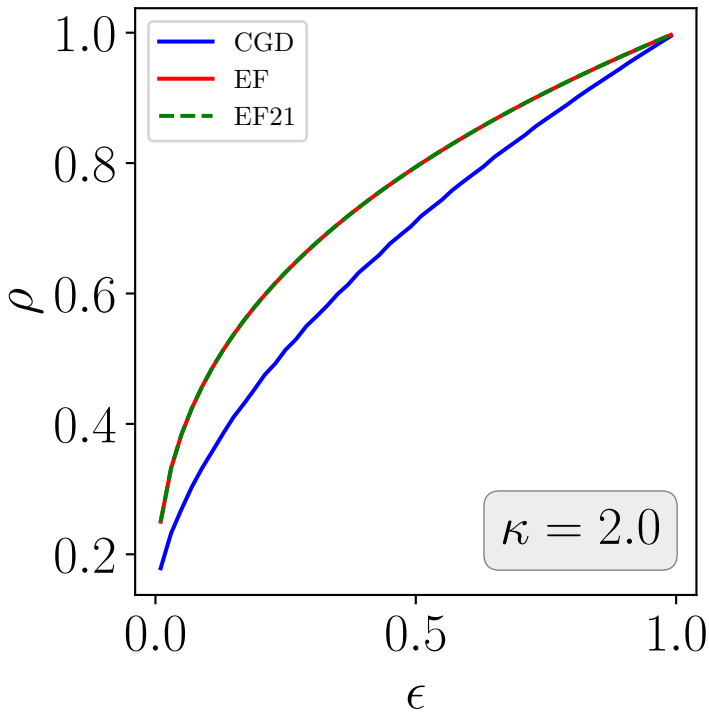

Supplement: supplementary_material [file cgd_superiority_mu_0.5.pdf › neurips2025/figures/cgd_superiority_mu_0.5.pdf]

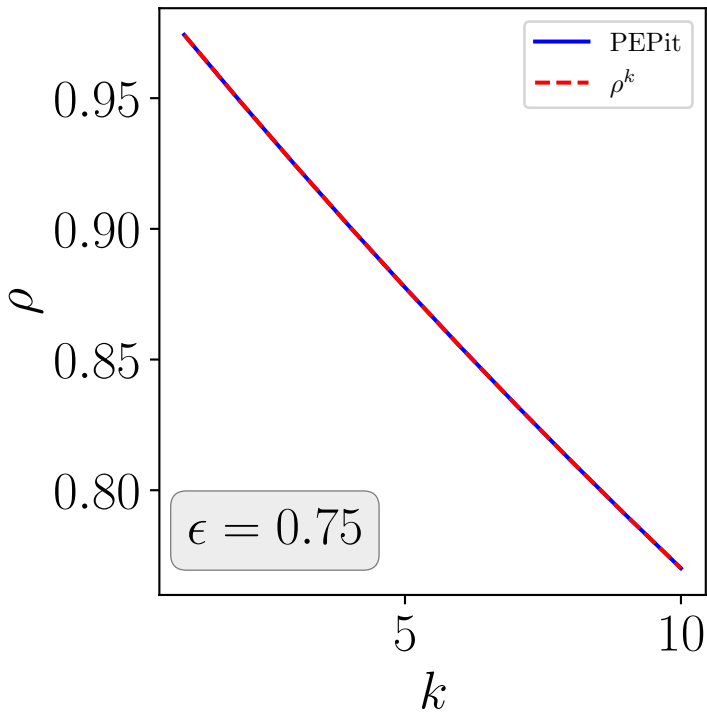

Supplement: supplementary_material [file ef21_multiple_iterations_delta_0.25.pdf › neurips2025/figures/ef21_multiple_iterations_delta_0.25.pdf]

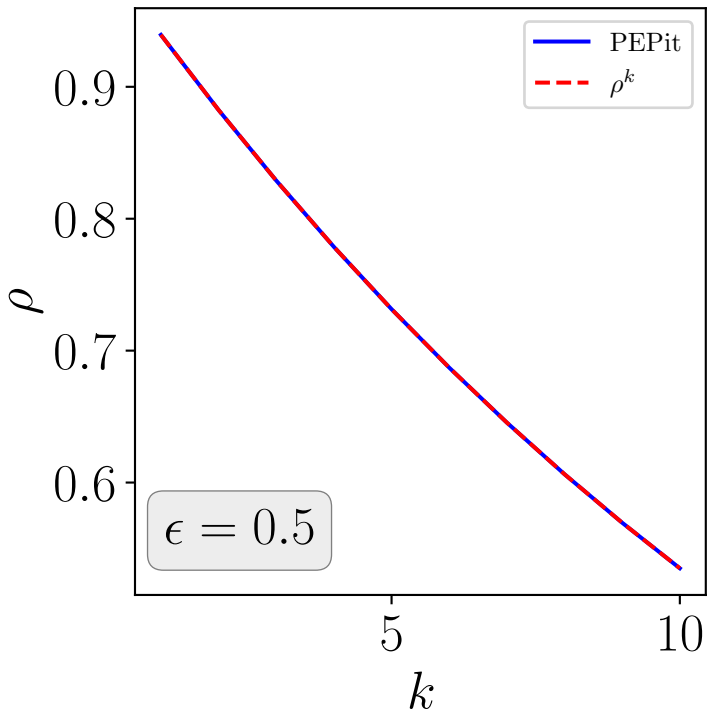

Supplement: supplementary_material [file ef21_multiple_iterations_delta_0.5.pdf › neurips2025/figures/ef21_multiple_iterations_delta_0.5.pdf]

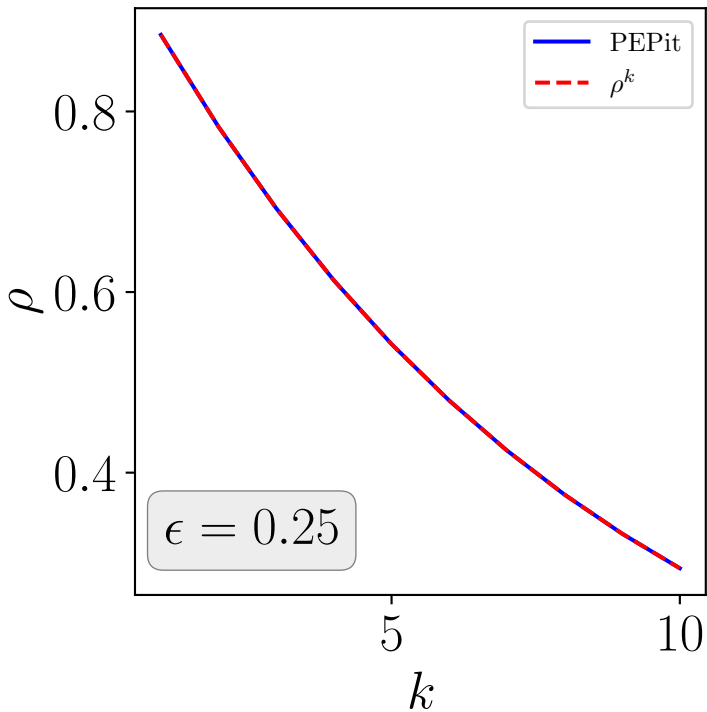

Supplement: supplementary_material [file ef21_multiple_iterations_delta_0.75.pdf › neurips2025/figures/ef21_multiple_iterations_delta_0.75.pdf]

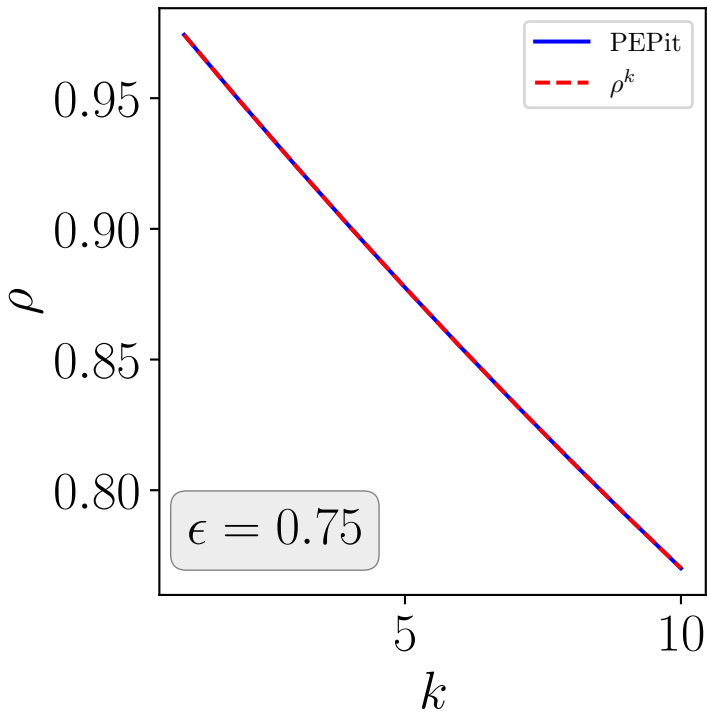

Supplement: supplementary_material [file ef_multiple_iterations_delta_0.25.pdf › neurips2025/figures/ef_multiple_iterations_delta_0.25.pdf]

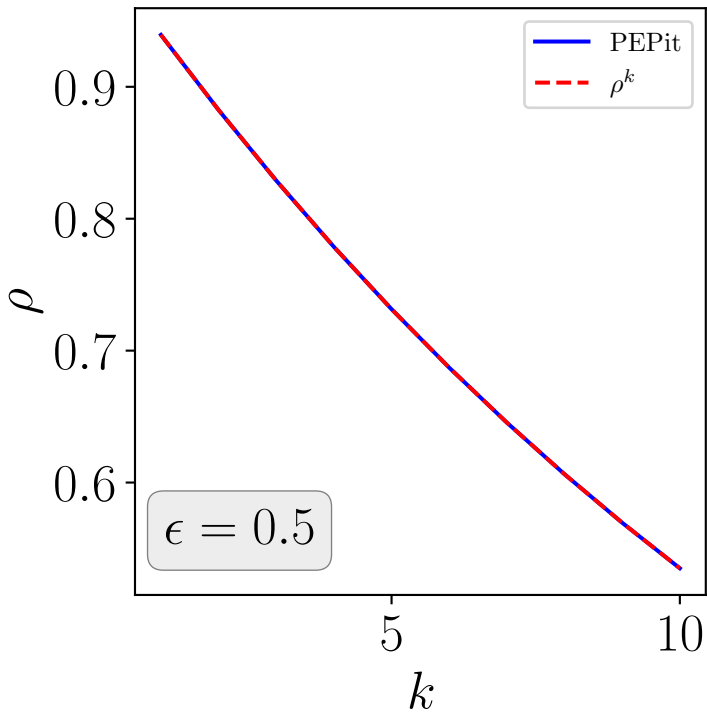

Supplement: supplementary_material [file ef_multiple_iterations_delta_0.5.pdf › neurips2025/figures/ef_multiple_iterations_delta_0.5.pdf]

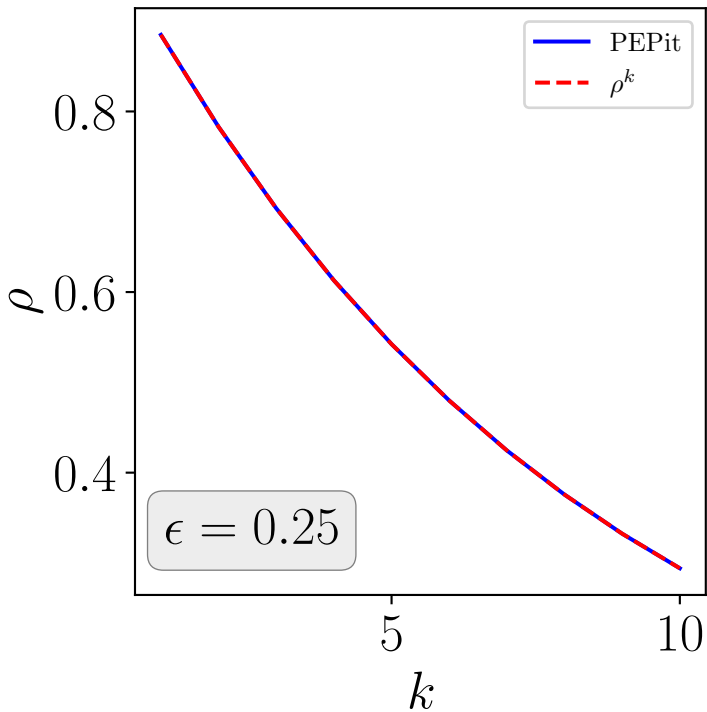

Supplement: supplementary_material [file ef_multiple_iterations_delta_0.75.pdf › neurips2025/figures/ef_multiple_iterations_delta_0.75.pdf]

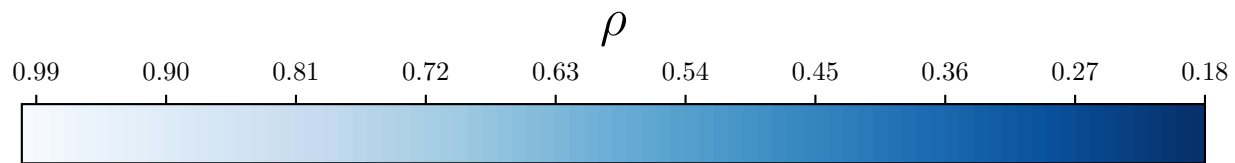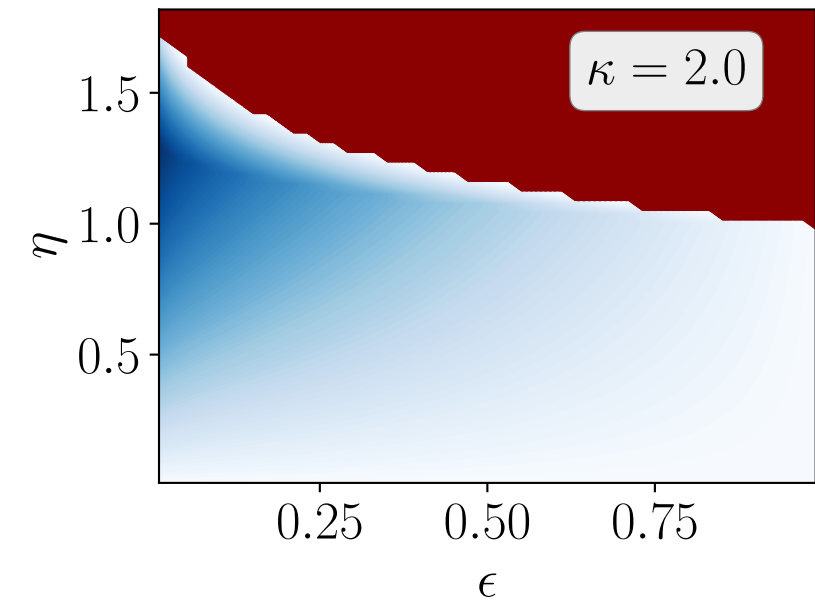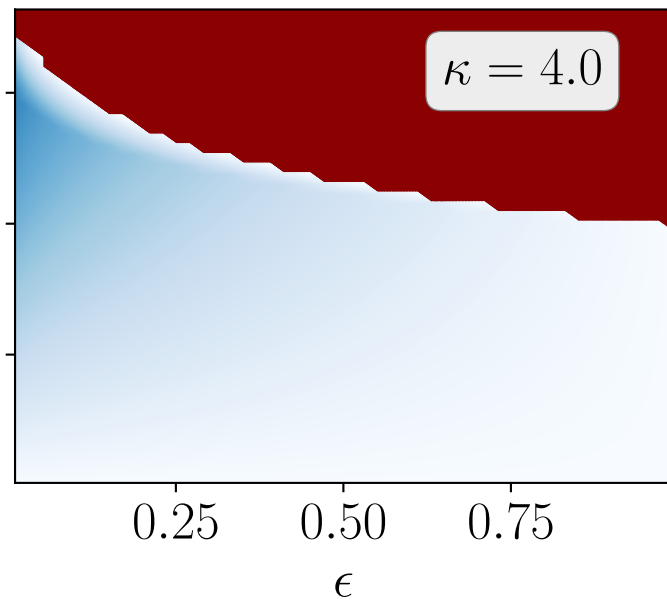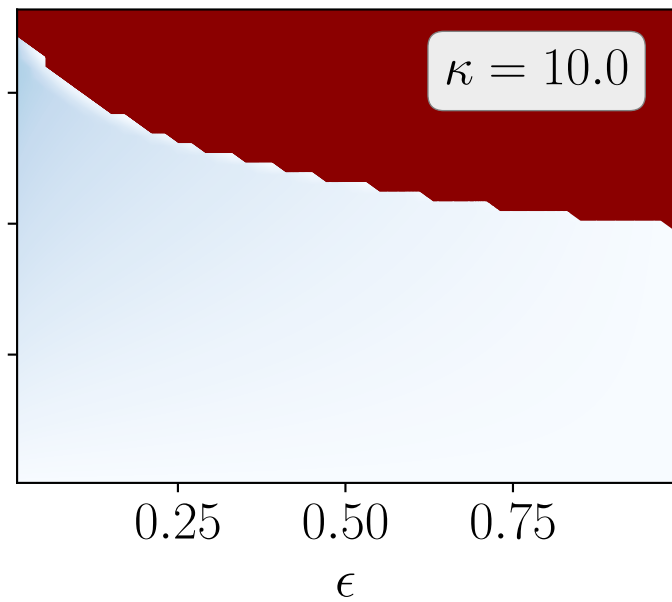

Supplement: supplementary_material [file performance_cgd.pdf › neurips2025/figures/performance_cgd.pdf]

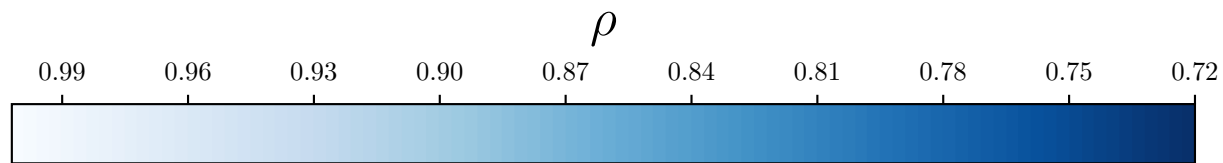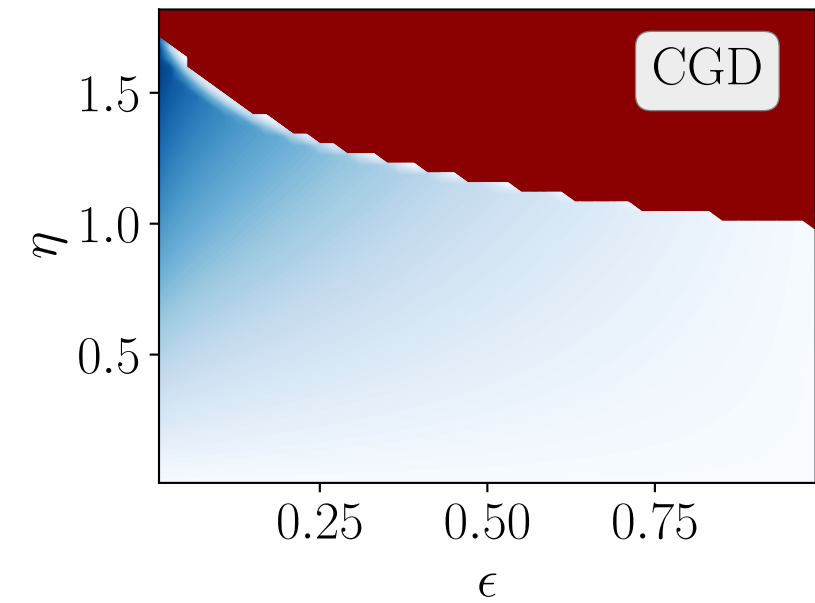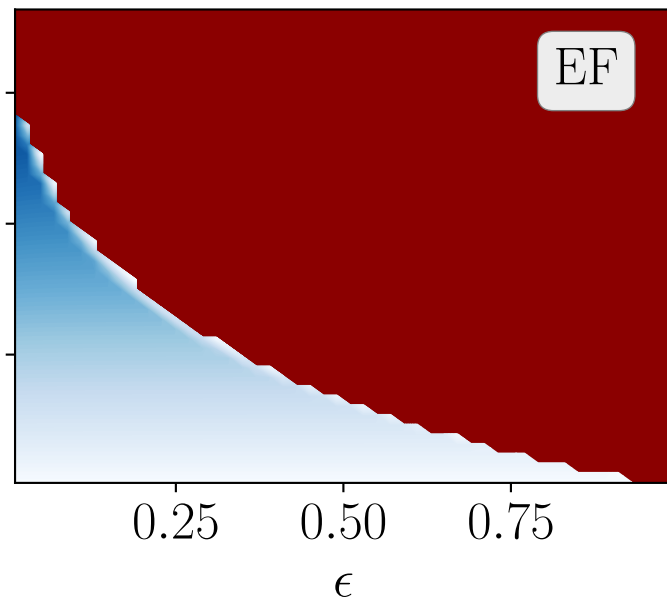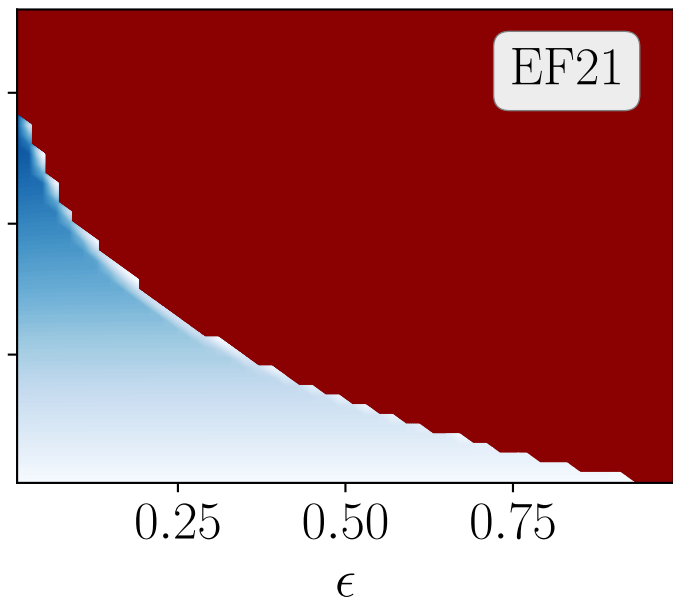

Supplement: supplementary_material [file performance_comparison.pdf › neurips2025/figures/performance_comparison.pdf]

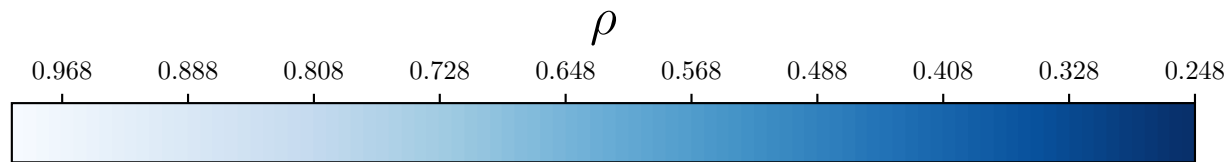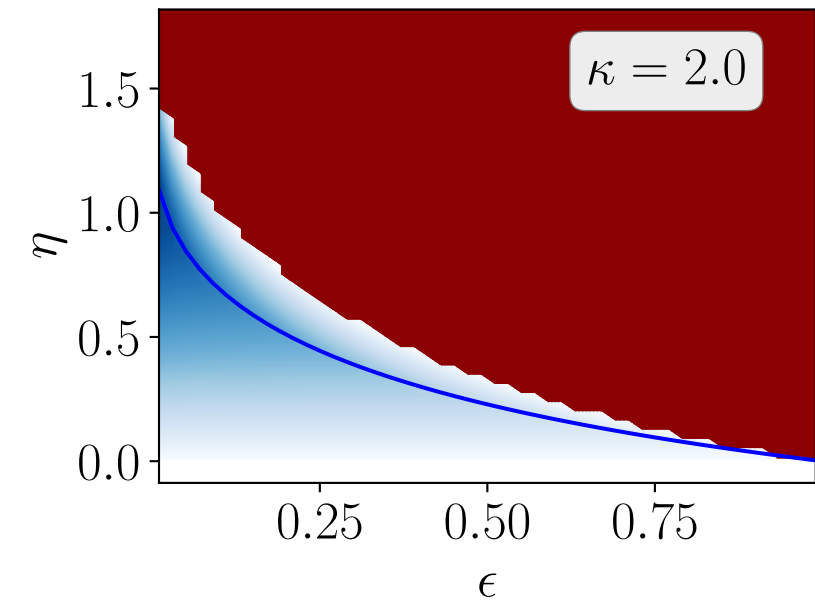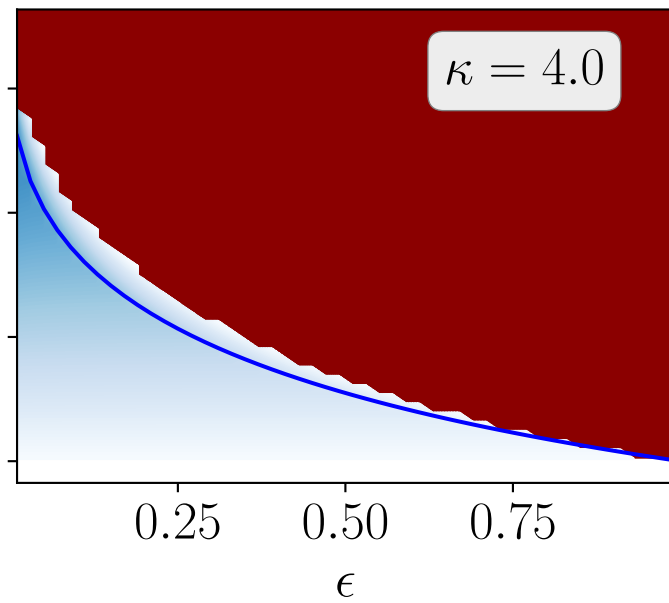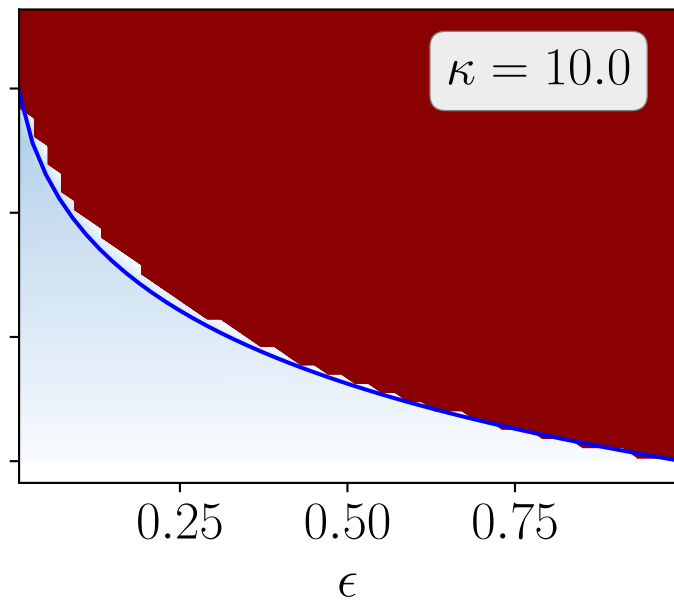

Supplement: supplementary_material [file performance_ef.pdf › neurips2025/figures/performance_ef.pdf]

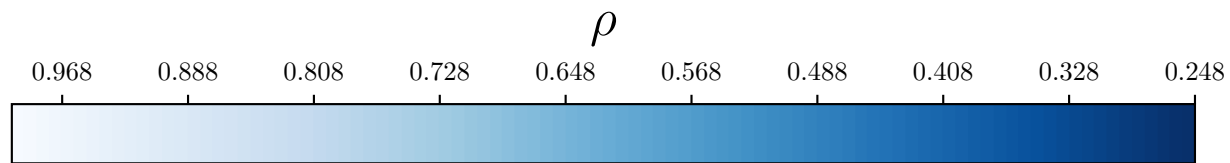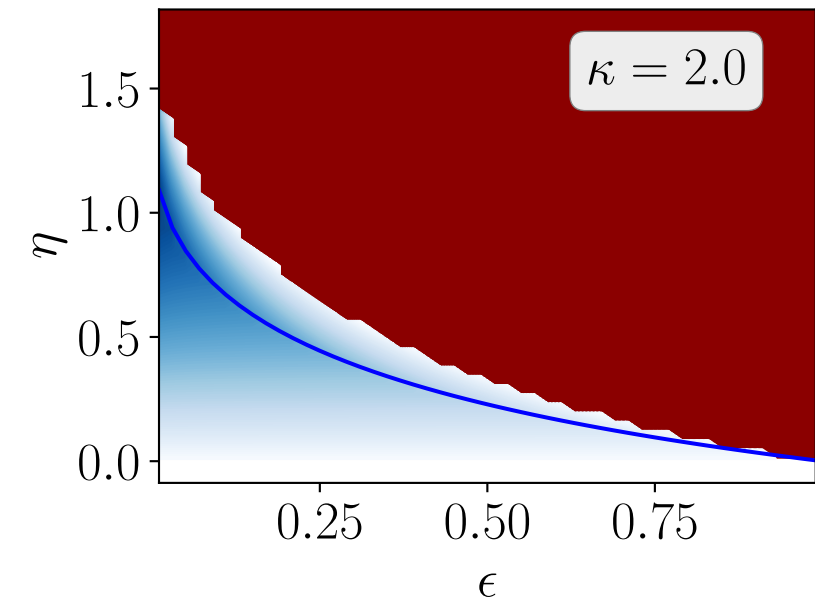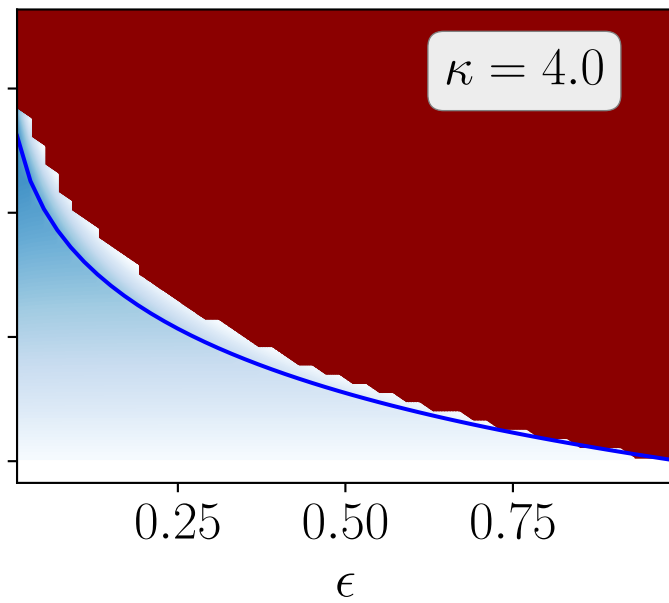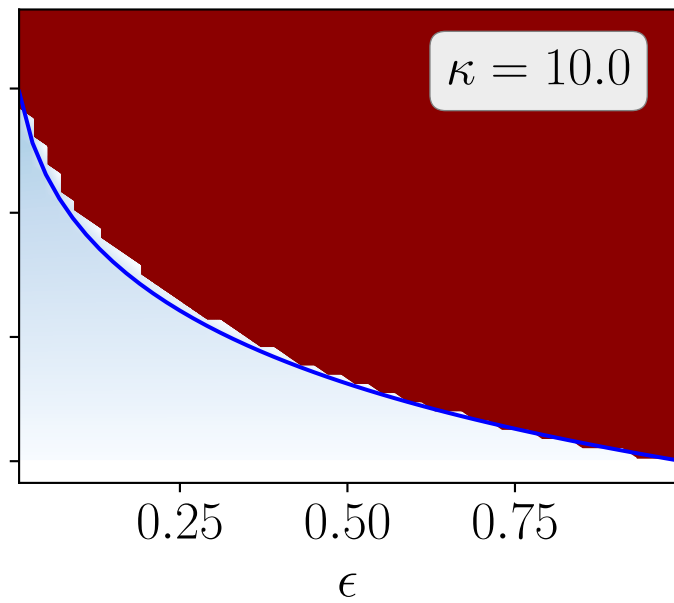

Supplement: supplementary_material [file performance_ef21.pdf › neurips2025/figures/performance_ef21.pdf]
